# Supplementary material for: Identification and validation of targets of swertiamarin on idiopathic pulmonary fibrosis through bioinformatics and molecular docking-based approach
Source: Springer Nature journal article supplement (doi:10.1186/s12906-023-04171-w), 2023-10-05
Supplement: MOESM4 [file 26131982]

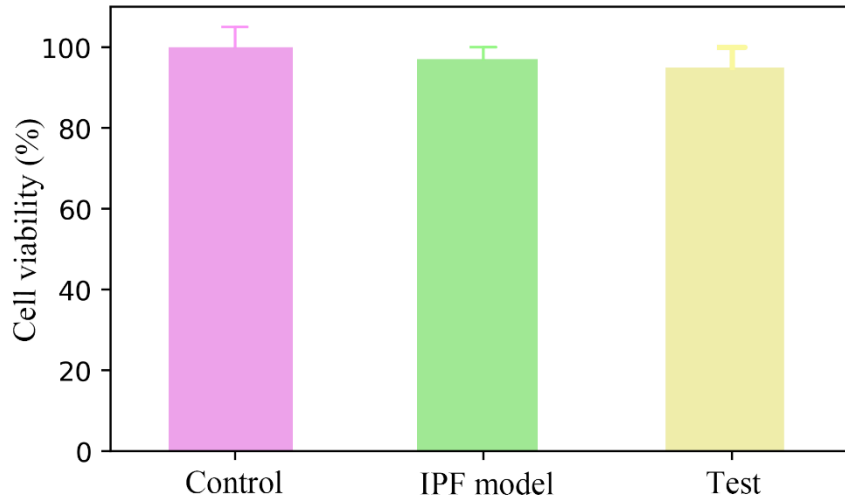

Supplement 4. The effect of swertiamarin on the viability of A549 cells.

The A549 cells with a concentration of 2000 cells/ml (control group) were induced by 10ng/ml of TGF- $\beta$ 1 (IPF model group) to build the *in vitro* IPF model. After 6h of culture, 1.5 $\mu$ mol/l of swertiamarin was added to the culture (test group). The cells were continued to be cultured under the same conditions for another 24h and then 10 $\mu$ l of CCK8 was added into each group. After being cultured for the next 4h, the OD<sub>450</sub> values were measured to calculate the viabilities of cells for all groups.
