# Supplementary material for: Identification and validation of targets of swertiamarin on idiopathic pulmonary fibrosis through bioinformatics and molecular docking-based approach
Source: BMC Complement Med Ther. 2023 Oct 5;23:352. doi: 10.1186/s12906-023-04171-w (PMC10557187; doi:10.1186/s12906-023-04171-w)
Supplement: Supplementary file 1 — Supplementary Material 1 [file 12906_2023_4171_MOESM1_ESM.xlsx]

## Sheet: Supplement 7. overlapping upreg
ABCA1
ABCA6
ADAM23
ADAMTS5
ALDH1A3
APH1B
ASPH
ATP6V1A
ATP8B4
BAZ2B
BBOF1
BICC1
BMP2K
C1S
CCDC80
CCND2
CHEK2
COL3A1
COL5A2
CTSL
CYP1B1
DZIP1
ELMOD2
FAM69A
FBN1
FBN2
FBXO32
FGF7
FLRT2
FNIP1
GPNMB
HEPH
HGF
HNMT
IDH1
IL13RA2
IL1R1
ITGAV
KRT17
LMAN1
LOX
LXN
MANBA
MDM2
MOXD1
NEK11
NPEPPS
NRP2
PAMR1
PAPPA
PDE1A
PDGFD
PPIC
PTGR1
RARRES1
RHOQ
RNASEL
RSRP1
SCN3A
SGCD
SLC16A7
SLC35D1
SLC39A9
SLC7A11
SMPDL3A
SNAP25
SPATA18
STEAP2
SYTL2
TBCK
TMEM45A
TMEM99
TTC39C
TXNRD1
WDR63
ZNF671
